# Supplementary material for: Nitric oxide donor protects against acetic acid-induced gastric ulcer in rats via S-nitrosylation of TRPV1 on vagus nerve
Source: PubMed Central journal article supplement (PMC5437002; doi:10.1038/s41598-017-02275-1), 2017-05-18

Nitric oxide donor protects against acetic acid-induced gastric  
ulcer in rats via S-nitrosylation of TRPV1 on vagus nerve

Ting Han<sup>1</sup>, Yan Tang<sup>1</sup>, Jing Li<sup>1</sup>, Bing Xue<sup>1</sup>, Liping Gong<sup>1</sup>, Jingxin Li<sup>1</sup>, Xiao Yu<sup>1</sup> &  
Chuanyong Liu<sup>1,2</sup>

<sup>1</sup>Department of Physiology, School of Basic Medical Sciences, Shandong University  
Cheeloo Medical College, China.

<sup>2</sup>Provincial Key Lab of Mental Disorder, School of Basic Medical Sciences,  
Shandong University Cheeloo Medical College, China.

**Correspondence to:**

Chuanyong Liu, Department of Physiology, School of Basic Medical Sciences,  
Shandong University Cheeloo Medical College, China.

Tel: +86-531-88380018; fax: +86-531-88383902.

E-mail address: liucy@sdu.edu.cn.

**Supplementary Figure S1. The excitatory effect of CCK on mesenteric afferent discharge was abolished by prior subdiaphragmatic vagotomy.**

- (a) Response of whole nerve activity before and after CCK (100 pM) administration on sham-operation and vagotomy rats. The upper trace shows the raw recording of whole nerve discharge, the middle trace is the number of nerve discharge in 3 sec, and the lower trace shows corresponding intraluminal pressure. The arrows indicate the administration of CCK (100 pM). After vagotomy, CCK failed to increase the spontaneous afferent discharge.
- (b) Summary values showing that the excitatory effect of CCK (100pM) was eliminated by vagotomy.  $n = 6$  in each group, \*  $P < 0.05$  vs sham-operation group, Students'  $t$ -test.

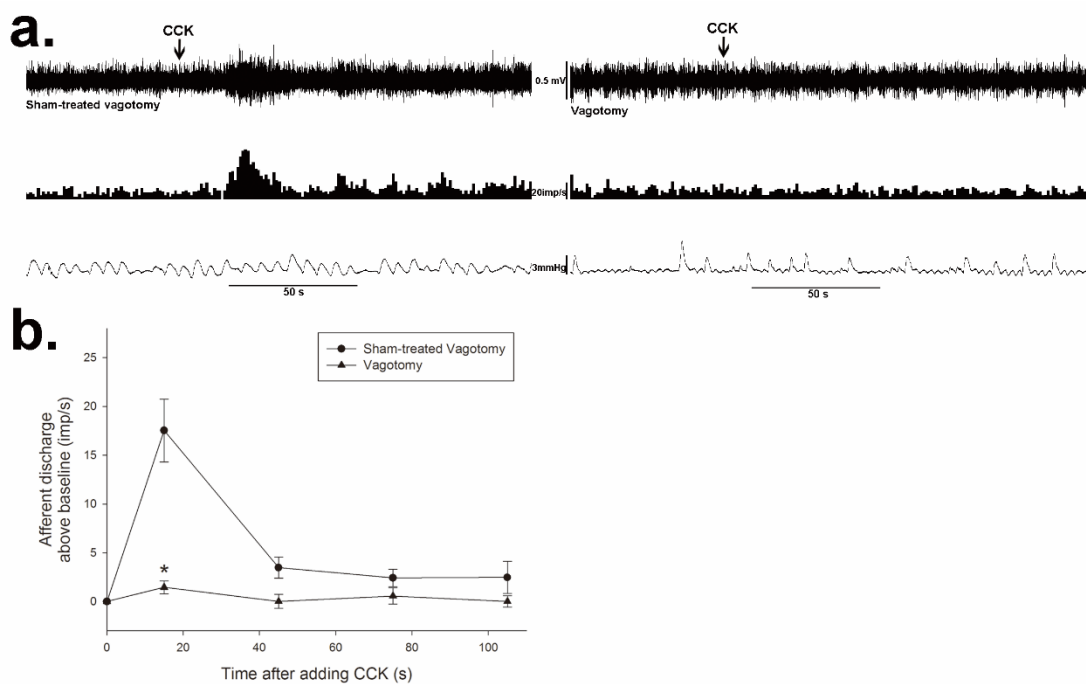

Supplement: 41598_2017_2275_MOESM1_ESM.pdf [file 41598_2017_2275_MOESM1_ESM.pdf]
